# Supplementary material for: The psychological burden in survivors of stroke and caregivers dyads in Kinshasa (Democratic Republic of Congo): a cross-sectional study
Source: Research Square preprint supplement (doi:10.21203/rs.3.rs-336489/v1), 2021-03-22
Supplement: Supplementary file 1 [file e12646b59e94a45373f8bfa7.docx]

**Table1: Participants socio-demographic characteristics**

| Variables | Caregivers | |  |  | Patients |  |
| --- | --- | --- | --- | --- | --- | --- |
|  | N: 85 | | Percent |  | N: 85 | Percent |
| Age (years) **Mean ± SD** | 42,3 ± 14,34 | |  |  | 59,02 ± 13,08 | |
| Sex |  | |  |  |  |  |
| Female | 58 | | 68,2 |  | 45 | 52.9 |
| Male | 27 | | 31,8 |  | 40 | 47.3 |
| Sex ratio 2.1:1 (F/M) | | | | | | |
| Marital status |  | |  |  |  |  |
| Married | 49 | | 57,6 |  | 51 | 60 |
| Others | 36 | | 42,4 |  | 34 | 40 |
| Educational level attained |  | |  |  |  |  |
| Illiterate | 4 | | 4,7 |  | 27 | 31.8 |
| Primary | 14 | | 16,5 |  | 10 | 11.8 |
| Secondary | 32 | | 7,6 |  | 16 | 18.8 |
| University | 35 | | 41,2 |  | 32 | 37.6 |
| Occupation |  | |  |  |  |  |
| Unemployed | 31 | | 36,5 |  | 54 | 63.5 |
| Employed | 54 | | 63,5 |  | 31 | 36.5 |
| Relationship with the patient |  | |  |  | - |  |
| Husband/wife | 32 | | 37,6 |  | - |  |
| Relative of first generation | 35 | | 41,2 |  | - |  |
| Sister/brother/cousin | 9 | | 10,6 |  | - |  |
| Uncle | 3 | | 3,5 |  | - |  |
| Others | 6 | | 7,1 |  | - |  |
| Prior history of participants |  | |  |  | - |  |
| No | 56 | | 65,9 |  | - |  |
| Yes | 29 | | 34,1 |  | - |  |
| Participant’s information |  | |  |  |  |  |
| NO | 72 | | 84,7 |  | - |  |
| Yes | 13 | | 15,3 |  | - |  |
| Training of participants |  | |  |  | - |  |
| Yes | 7 | | 8,2 |  | - |  |
| No | 78 | | 91,8 |  | - |  |
| Motivation |  | |  |  | - |  |
| Family support | 78 | | 91,8 |  | - |  |
| Other | 7 | | 8,2 |  | - |  |
| Support given by the participant |  | |  |  | - |  |
| No | 81 | | 95,3 |  | - |  |
| Yes | 4 | | 4,7 |  | - |  |
| Duration of taking care (years) | 1,69 | | 1,34 |  | - |  |
| Functional autonomy |  | |  |  |  |  |
| mRS | |  |  |  | 2,59 ± 1,2 |  |
| Yes | |  |  |  | 43 (50,6) |  |
| No | |  |  |  | 1. (49,4) |  |
